# Supplementary material
Source: PubMed Central journal article supplement (PMC3072215)
Supplement: NIHMS213095-supplement-7.pdf [file NIHMS213095-supplement-7.pdf]

## **The XLMR gene PHF8 encodes a histone H4K20/H3K9 demethylase and regulates zebrafish brain and craniofacial development**

Hank H. Qi<sup>1,2\*</sup>, Madathia Sarkissian<sup>3,4\*</sup>, Gang-Qing Hu<sup>5##</sup>, Zhibin Wang<sup>5##</sup>, Arindam Bhattacharjee<sup>6</sup>, D. Benjamin Gordon<sup>6</sup>, Michelle Gonzales<sup>7</sup>, Fei Lan<sup>1,4</sup>, Pat P. Ongusaha<sup>8</sup>, Maite Huarte<sup>1,9</sup>, Nasser K. Yaghi<sup>1,10</sup>, Huijun Lim<sup>1,2</sup>, Benjamin A. Garcia<sup>7</sup>, Leonardo Brizuela<sup>6</sup>, Keji Zhao<sup>5</sup>, Thomas M. Roberts<sup>3,#</sup>, & Yang Shi<sup>1,2,#</sup>

<sup>1</sup> Department of Pathology, Harvard Medical School, Boston, MA, 02115

<sup>2</sup> Division of Newborn Medicine, Department of Medicine, Children's Hospital, Boston, MA, 02115

<sup>3</sup> Department of Cancer Biology, Dana Farber Cancer Institute, Boston, MA 02115, USA

<sup>4</sup> Current address: Constellation Pharmaceuticals, 148 Sidney Street, Cambridge, MA 02139

<sup>5</sup> Laboratory of Molecular Immunology, National Heart, Lung and Blood Institute, National Institutes of Health, Bethesda, MD 20892

<sup>6</sup> Agilent Technologies, 5301 Stevens Creek Boulevard, Santa Clara, California 95051-8059

<sup>7</sup> Department of Molecular Biology, Princeton University, Princeton, NJ, 08544

<sup>8</sup> Vascular Medicine Research Unit, Brigham and Women's Hospital and Harvard Medical School, Boston, MA, 02139

<sup>9</sup> Current address: Department of Pathology, Beth Israel Deaconess Medical Center, Harvard Medical School, Boston, MA, 02215

<sup>10</sup> Current address: Department of Molecular & Cell Biology, Texas A&M University, College Station, TX, 77853

\* These authors contributed equally; ## These authors contributed equally

# Correspondence and requests for materials should be addressed to Yang Shi ([yshi@hms.harvard.edu](mailto:yshi@hms.harvard.edu)) and Thomas Roberts ([thomas\\_roberts@dfci.harvard.edu](mailto:thomas_roberts@dfci.harvard.edu))

## **Supplemental Information**

Merged Supplemental Figure 1 to 15 and Supplemental Tables 1, 2, 5 and 7, 8, 9.

Supplemental Table 3. ChIP-seq results of PHF8 binding events around TSS, xls file

Supplemental Table 4. ChIP-chip results of PHF8 binding events around TSS, xls file

Supplemental Table 6. Gene expression microarray data (Phalanx) from HeLa cells and  
IPA Analysis, xls file

## Supplemental Figure 1

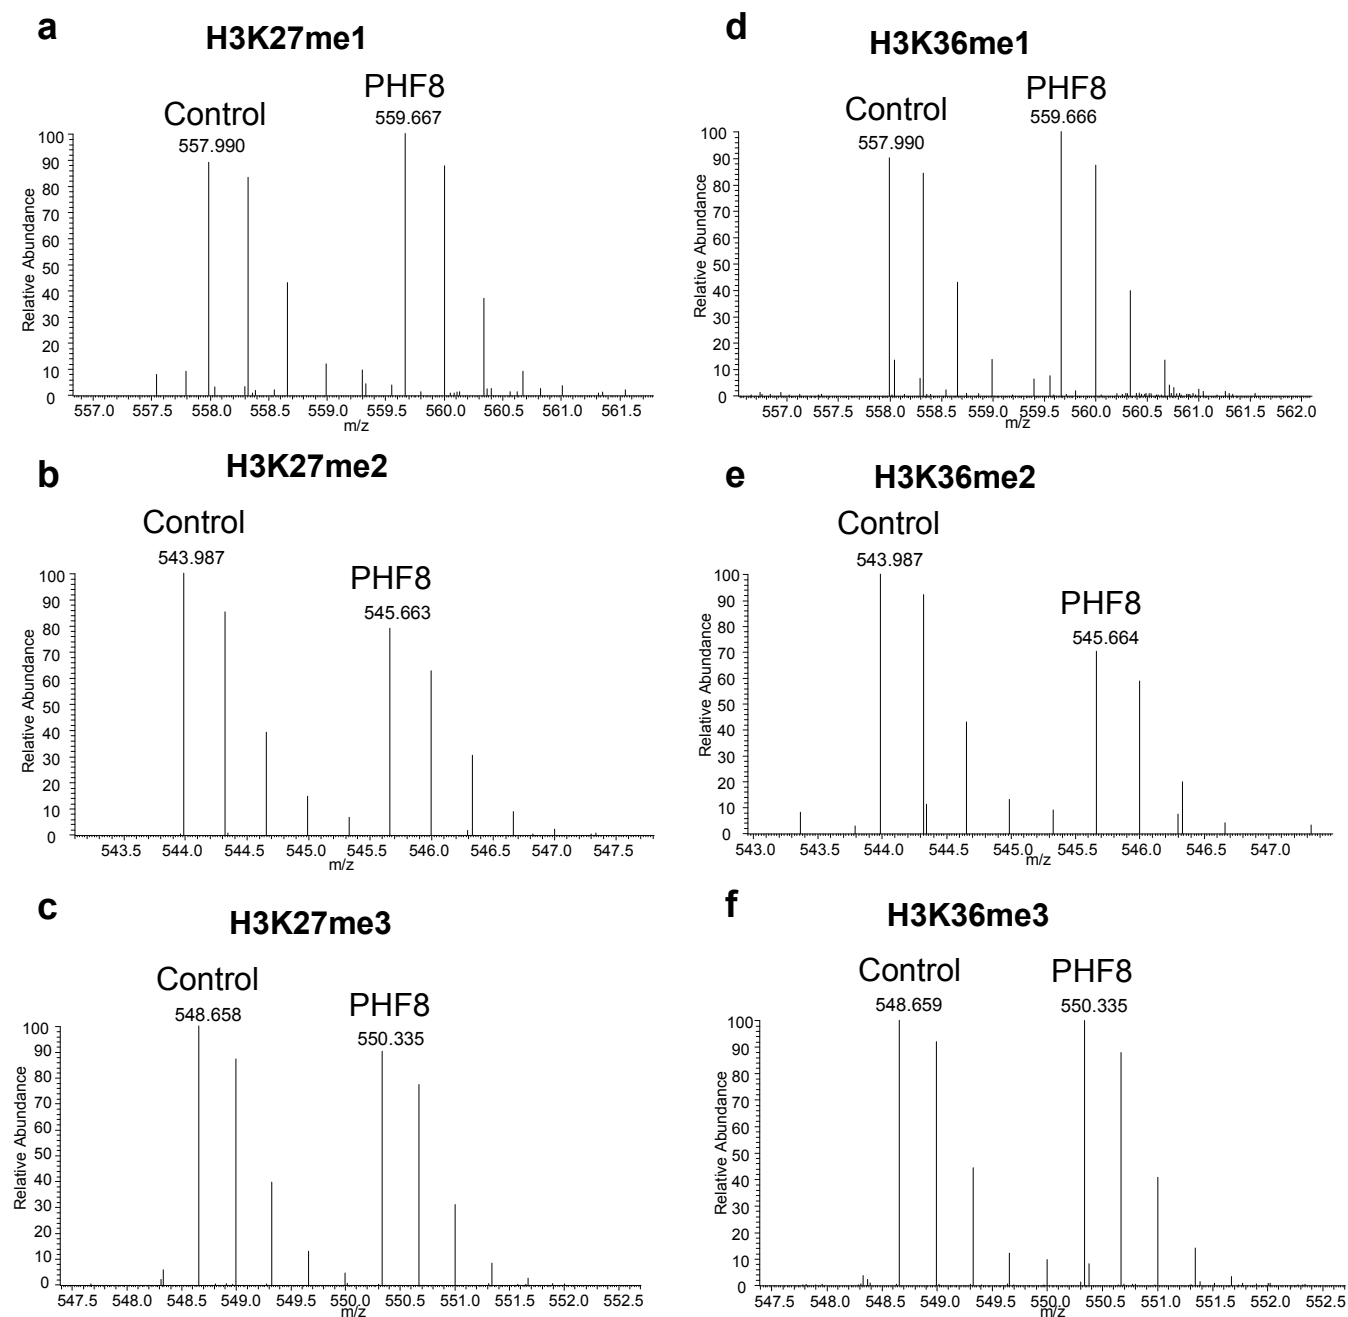

**Supplemental Figure 1.** Mass spectrometry analysis of selected histone peptides from control (GST) and PHF8 (GST-PHF8(1-447)) *in vitro* reacted HeLa cell nucleosomes. Nucleosome samples from the control and PHF8 demethylation reaction were chemically isotopically labeled with D0-propionyl and D5-propionyl, respectively. This labeling induces a 5 Da mass shift between the two samples, which is observed as a 2.5 m/z shift for doubly charged peptides. Shown are m/z ranges depicting peptides from H3K27me1(a), H3K27me2 (b), H3K27me3 (c), H3K36me1 (d), H3K36me2 (e) and H3K36me3 (f). Moderate decreases for H3K27me2 and H3K36me2 were observed.

## Supplemental Figure 2

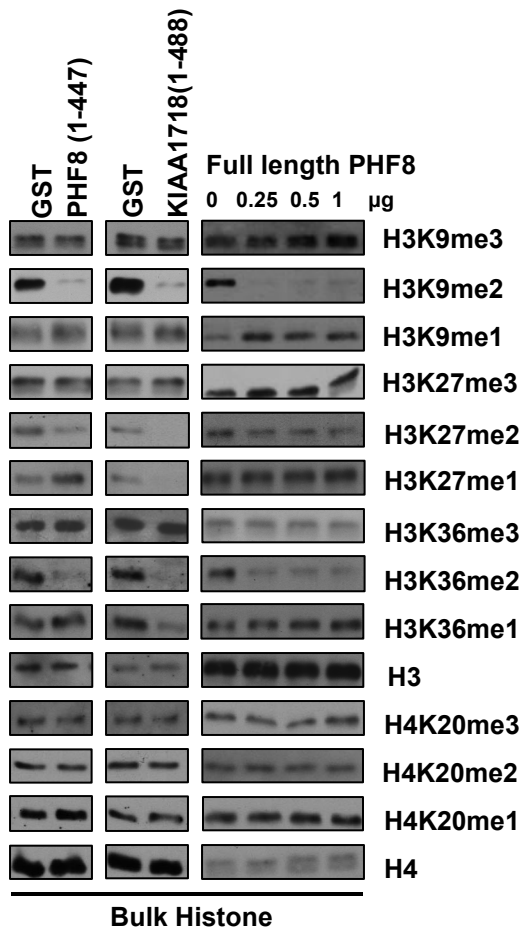

### Supplemental Figure 2. PPHF8 and KIAA1718 display demethylase activities on bulk histone.

In vitro demethylation assays on bulk histones (0.6µg) were performed with GST-fused portions of wtPPHF8 and KIAA1718 as well as full length PPHF8 purified from insect Sf9 cells. Western blots were performed with indicated antibodies.

**Supplemental Table 1. PPHF8 and KIAA1718 In vitro demethylase activities**

|                 | PPHF8   |            | KIAA1718 |            |
|-----------------|---------|------------|----------|------------|
|                 | Histone | Nucleosome | Histone  | Nucleosome |
| <b>H3K9me2</b>  | √       | √          | √        | √          |
| <b>H3K9me1</b>  | -       | √          | -        | √          |
| <b>H3K27me2</b> | √       | √          | √        | √          |
| <b>H3K27me1</b> | -       | -          | √        | -          |
| <b>H3K36me2</b> | √       | -          | √        | -          |
| <b>H3K36me1</b> | -       | -          | √        | -          |
| <b>H4K20me2</b> | -       | -          | -        | -          |
| <b>H4K20me1</b> | -       | √          | -        | √          |

PPHF8 and KIAA1718 did not show demethylase activities on tri-methylated H3K9, 27, 36 and H4K20.

### Supplemental Figure 3

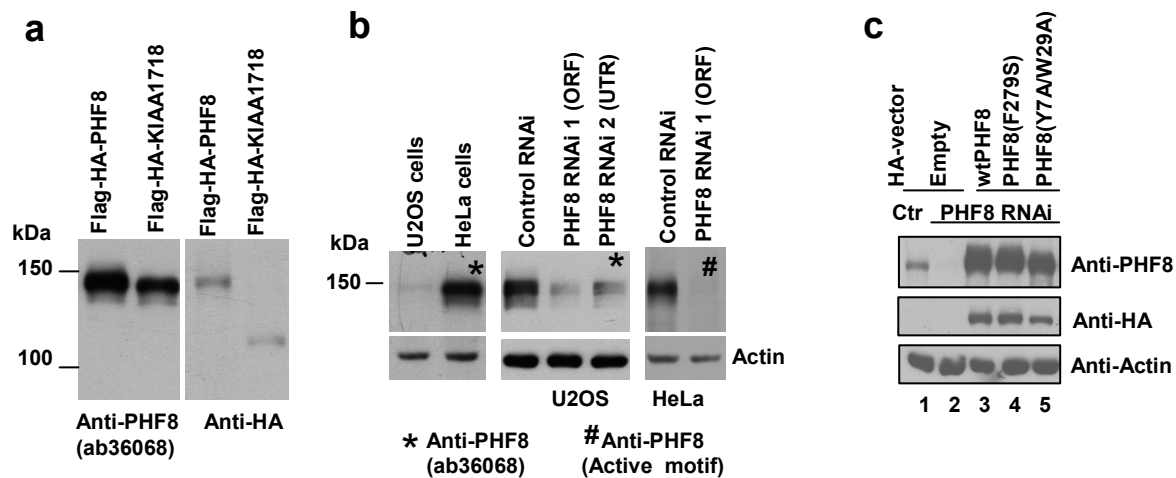

**Supplemental Figure 3. PHF8 antibody validation and PHF8 expression in the rescue experiments.** **a.** U2OS cells were transfected with Flag-HA-PHF8 or KIAA1718, followed with Western blot using anti-PHF8 (Ab36068) or Anti-HA antibodies. **b.** PHF8 protein level were examined in U2OS or HeLa cells (left). PHF8 RNAi efficiency was monitored in both U2OS (middle) and HeLa (right) cells with indicated antibodies. **c.** Experiment was described in Figure 3c. Western blot was performed with anti-HA, anti-PHF8 and anti-actin antibodies.

## Supplemental Figure 4

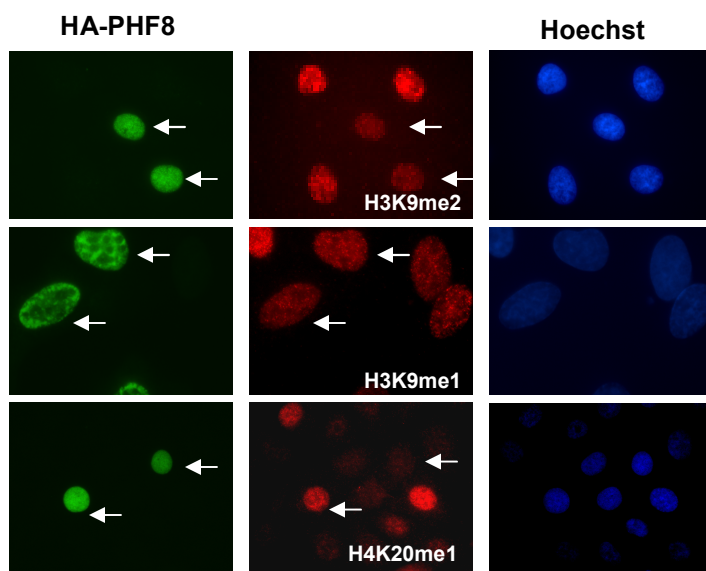

**Supplemental Figure 4.** Investigation of over-expressed PHF8 on global levels of histone H4K20me1 and H3K9me1/2. HA-PHF8 was transfected into U2OS cells, immunofluorescence was performed with anti-HA (polyclonal for the H3K9me2 panel, monoclonal for the H3K9me1 and H4K20me1 panels), H3K9me2 (Ab1220), H3K9me1 (Ab8898) and H4K20me1 (ab9051) antibodies. The H4K20me1 signal varies from cell to cell (high and low levels).

**Supplemental Table 2a. Over-expression of PHF8 decreased H3K9me2 in U2OS cells**

|          | No change       | Decrease               | Increase       |
|----------|-----------------|------------------------|----------------|
| H3K9me3  | 97.5% (195/200) | 1% (2/200)             | 1.5% (3/200)   |
| H3K9me2  | 2% (3/152)      | <u>90.8% (138/152)</u> | 7.2% (11/152)  |
| H3K9me1  | 80% (140/175)   | 5.7% (10/175)          | 13.8% (25/175) |
| H3K27me3 | 88% (184/209)   | 2.4% (5/209)           | 9.6% (20/209)  |
| H3K27me2 | 78.6% (88/112)  | 18.7% (21/112)         | 2.7% (3/112)   |
| H3K27me1 | 89.6% (69/77)   | 3.8% (3/77)            | 6.6% (5/77)    |
| H3K36me3 | 93.3% (125/134) | 3% (4/134)             | 3.7% (5/134)   |
| H3K36me2 | 89.3% (126/141) | 7% (10/141)            | 3.5% (5/141)   |
| H3K36me1 | 84.2% (128/152) | 6.6 (10/152)           | 9.2 (14/152)   |

**Supplemental Table 2b. Over-expression of PHF8 slightly reduced H4K20me1 level in U2OS cells**

| H4K20me1        | Low level              | High level     |
|-----------------|------------------------|----------------|
| Mock            | 67.2% (133/198)        | 32.8% (65/198) |
| wtPHF8          | <u>80.4% (218/271)</u> | 19.6% (53/271) |
| PHF8(F279S)     | 69% (200/290)          | 31% (90/290)   |
| PHF8(Y14A,W29A) | 66% (162/246)          | 34% (84/246)   |

## Supplemental Figure 5

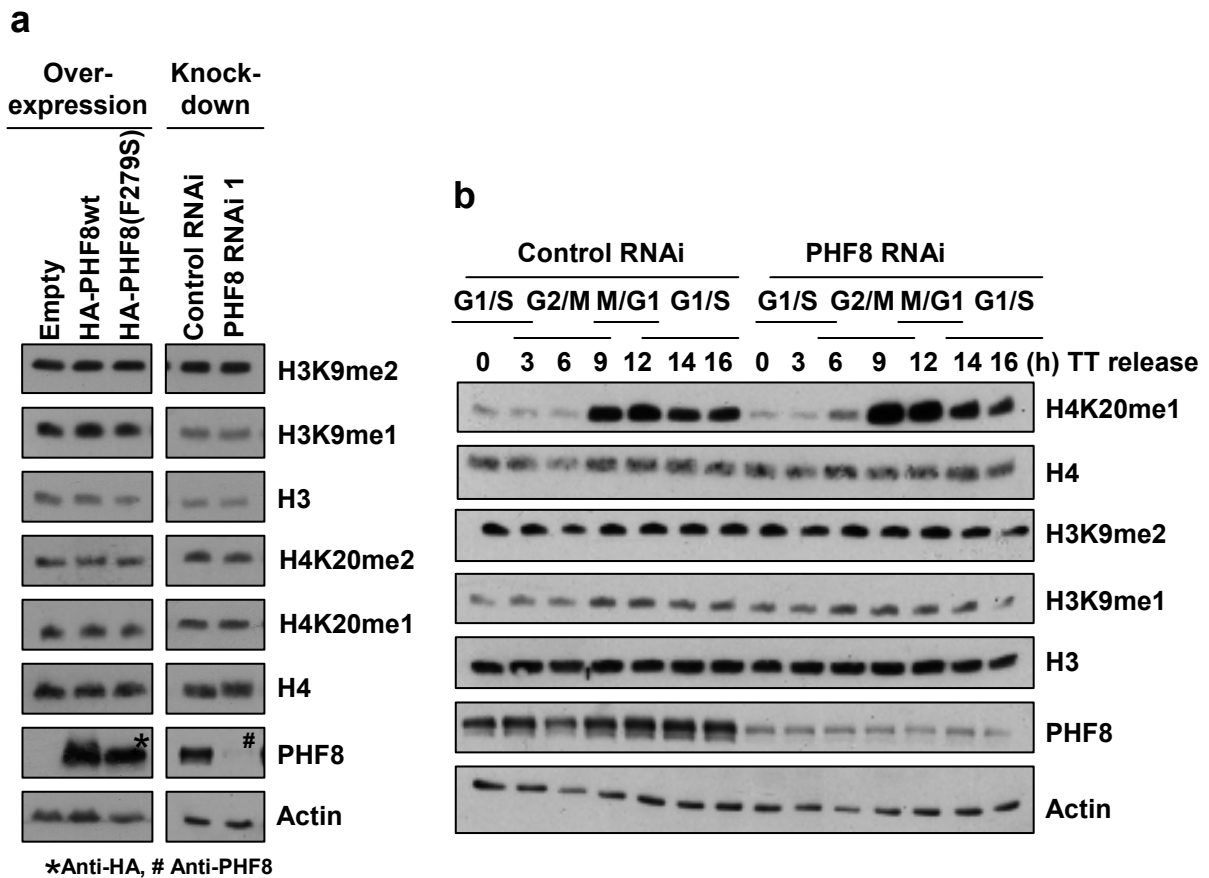

### Supplemental Figure 5. PHF8 impacts global H4K20me1 in a cell cycle dependent

**manner.** **a.** HeLa cells were either transfected with an empty vector, HA-PHF8wt or HA-PHF8 (F279S) (left panel) or stably expressing control or PHF8 shRNA (right panel) were lysed with 2% SDS. Western blot were carried out to determine histone modifications. **b.** Double thymidine (TT) block was performed in HeLa cells stably expressing control or PHF8 shRNA. Cells were released, collected at indicated time points and lysed with 2% SDS. Western blot were carried out with indicated antibodies.

## Supplemental Figure 6

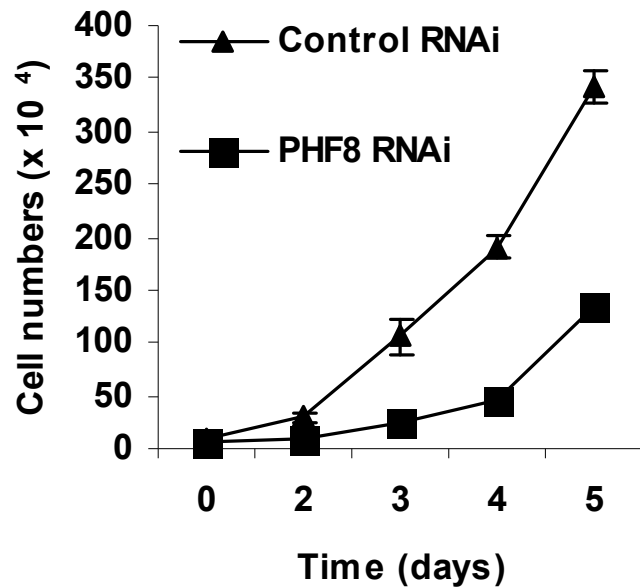

### Supplemental Figure 6. Knockdown of PHF8 impairs HeLa cell proliferation.

HeLa cells stably expressing control or PHF8 shRNA were seeded at  $1 \times 10^4$  cells in triplicate 60mm plates. Cells were trypsinized and counted at indicated time points. Standard deviation bars were obtained from the triplicate counts.



## Supplemental Figure 7

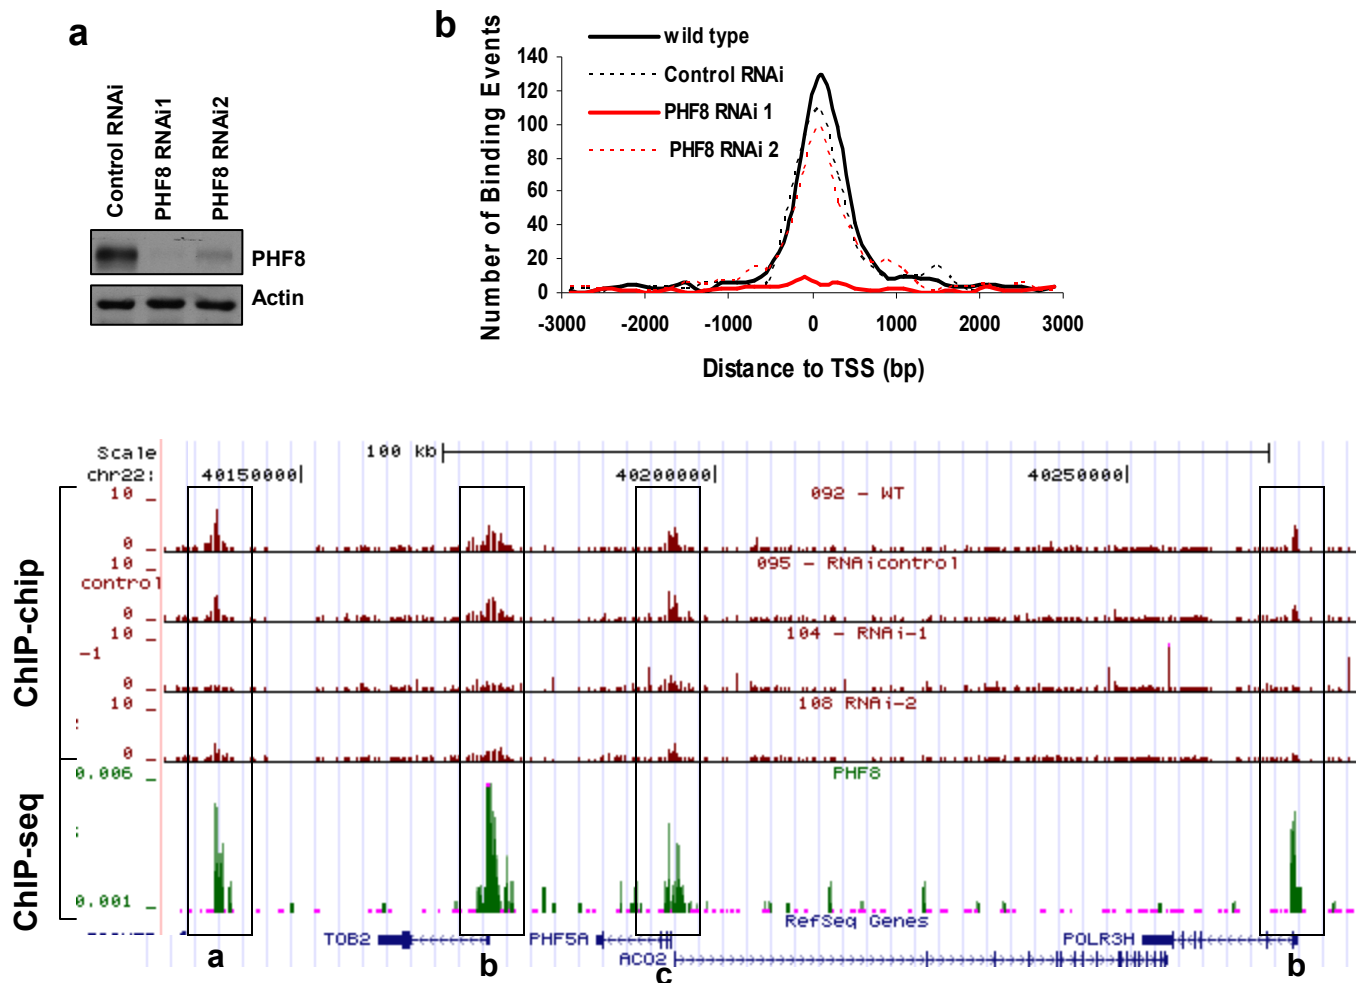

**Supplemental Figure 7 ChIP-chip and ChIP-seq identified PHF8 located near transcription start sites (TSS)** **a.** PHF8 RNAi efficiency was monitored by Western blot. **b.** Distribution of PHF8 binding events. The binding events from four ChIP-chip experiments were plotted. The data show that majority of binding events are within -0.5 to +1kb of TSS and PHF8 RNAi1 abolished majority of the binding events. **c.** ChIP-chip and ChIP-seq data were compared at a representative genomic region. PHF8 binding events were detected at intergenic region (a), near TSS of RefSeq genes (b), as well as region between two transcripts (c).

## Supplemental Figure 8

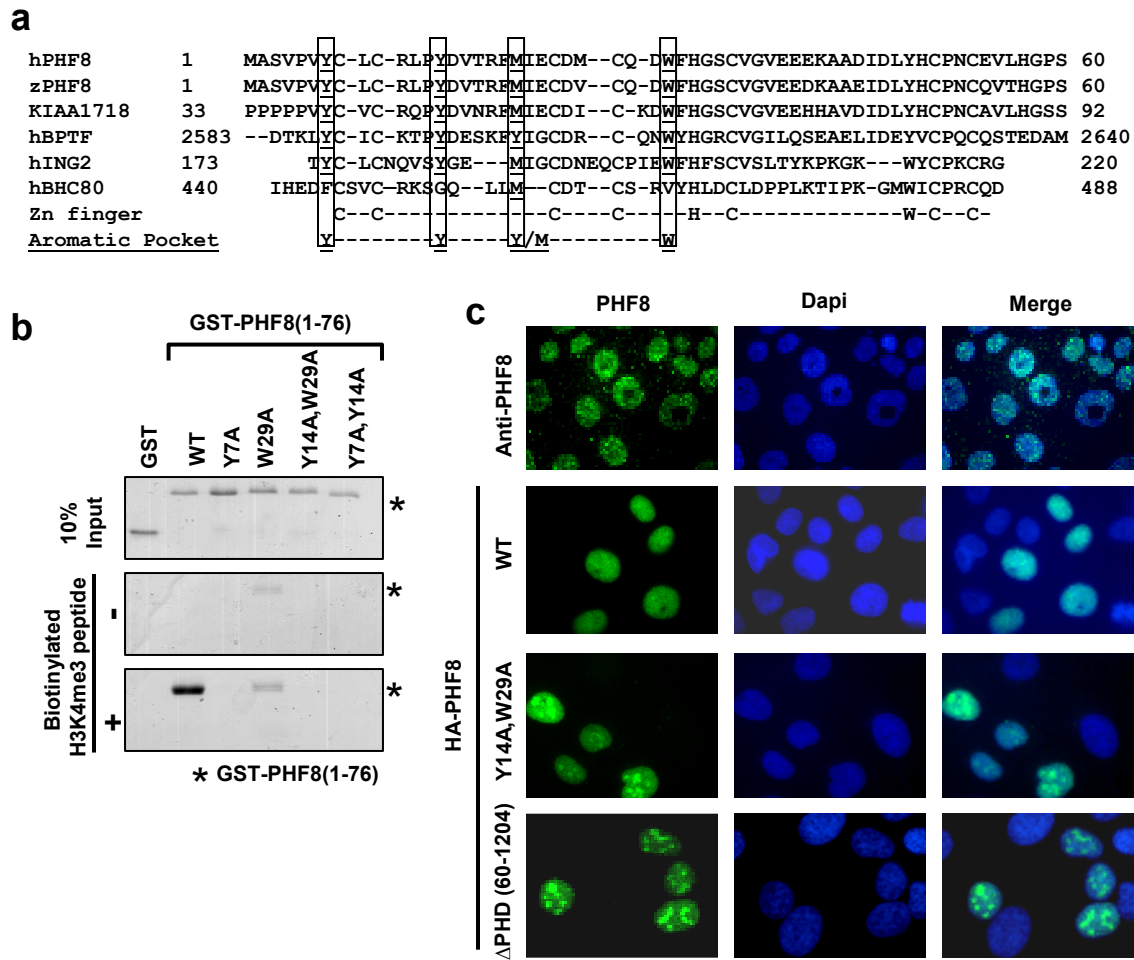

### Supplemental Figure 8. The aromatic pocket of PHF8 PHD finger is important for

**H3K4me3 binding and is required for PHF8 proper localization. a.** Alignment of PHD

fingers from human (h) and zebrafish (z)PHF8, KIAA1718, BPTF, ING2 and BHC80. Aromatic

pocket amino acids are highlighted with rectangular boxes. **b.** The PHD finger of PHF8 binds

H3K4me3. Wild type or mutant GST-PHF8 (1-76) proteins were incubated with indicated

biotinylated histone peptides. The bound GST-PHF8 was pulled down by streptavidin agarose

and visualized by Commassie blue staining. Input and bound GST-PHF8 (1-76) are indicated

by asterisks (\*). **c.** Immunofluorescence was performed using anti-PHF8 (Ab36068) or

anti-HA antibody in U2OS cells or U2OS cells transfected with indicated plasmids.

## Supplemental Figure 9

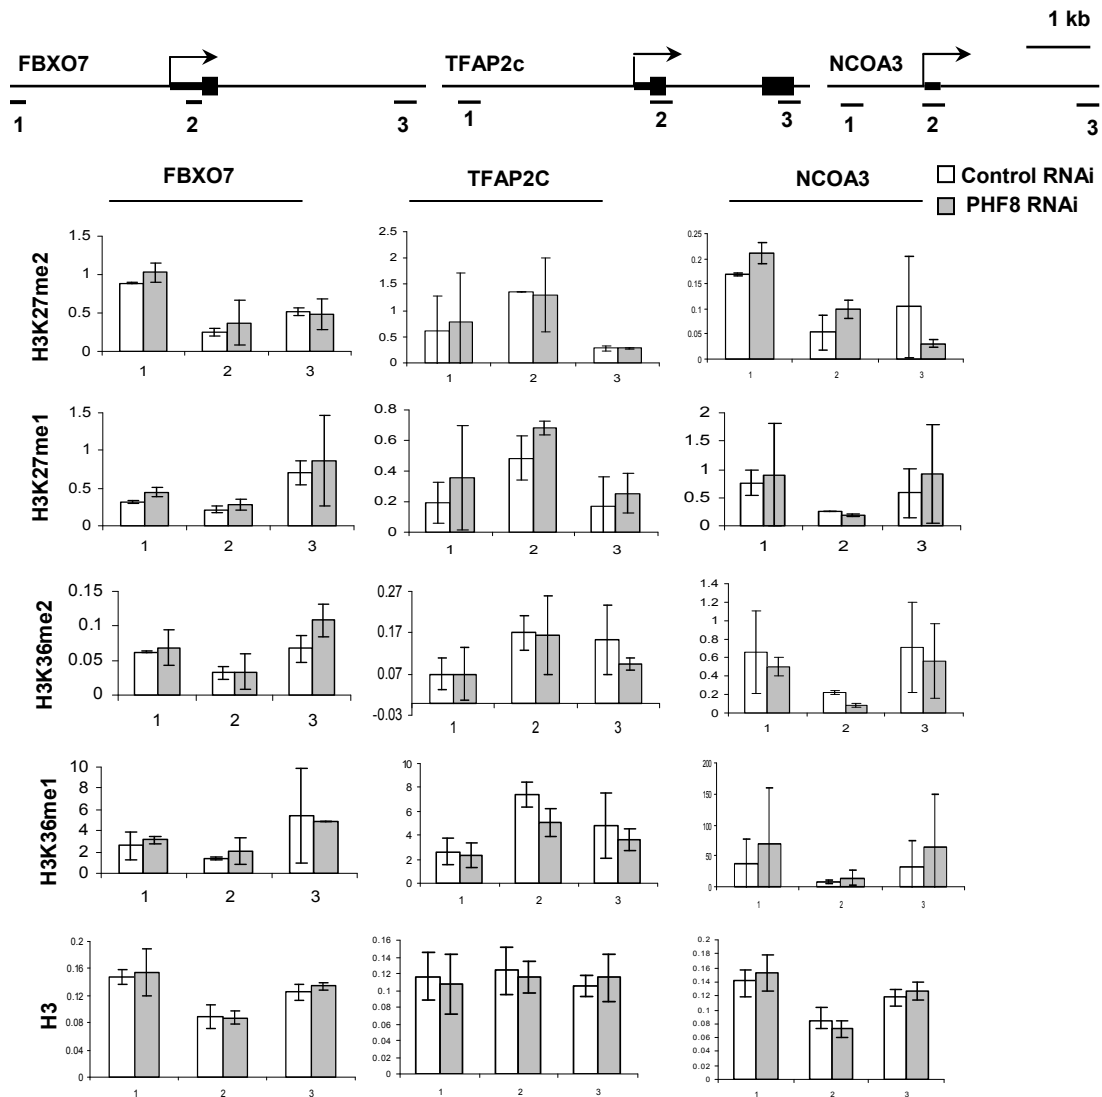

**Supplemental Figure 9. Knockdown of PHF8 has no impact on H3K27me2/1 and H3K36me2/1 at TBXO7, NCOA3, TFAP2C loci.** ChIP-qPCR was performed with indicated antibodies. Amplicon 2 represents the PHF8 binding locus. The standard deviations were obtained from three independent experiments. T-Test show that the p values are less than 0.05 comparing control and PHF8 RNAi, indicating no significant changes of these modifications in response to PHF8 knockdown.

## Supplemental Figure 10

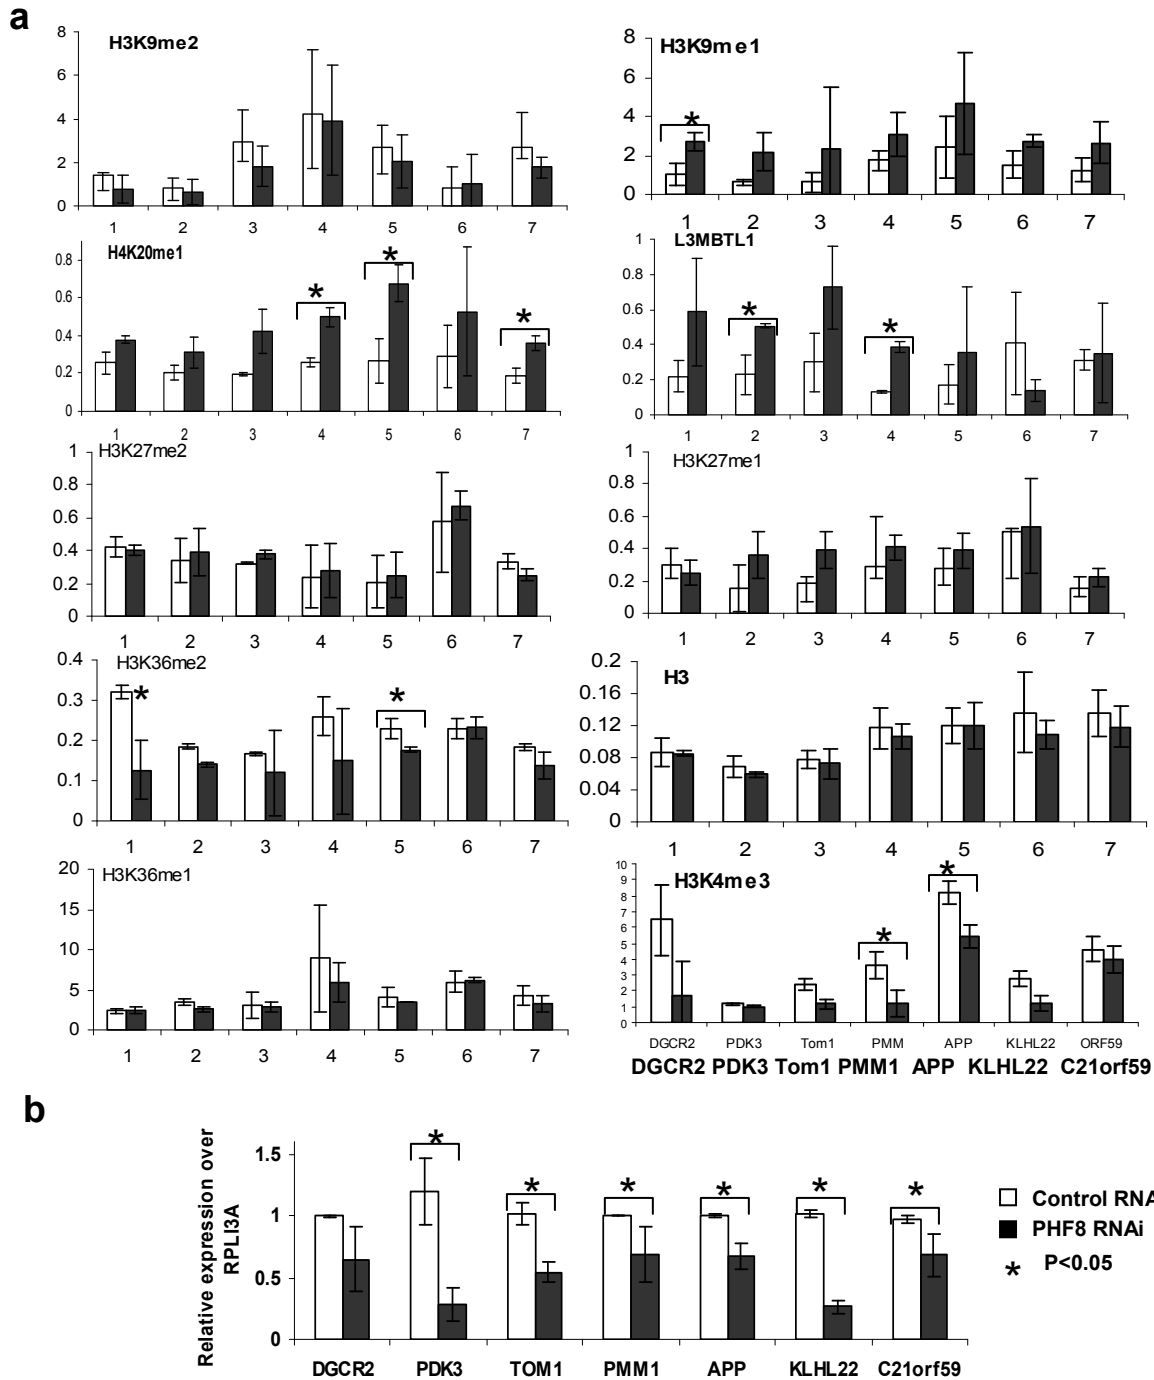

**Supplemental Figure 10. Knockdown of PHF8 results in increase of H4K20me1, H3K9me1 and L3MBTL1; and reduced target gene expression and H3K4me3. a.** Conventional ChIP assays with indicated antibodies were performed using HeLa cells stably expressing control or PHF8 shRNA. The amplicon spans PHF8 binding sites. **b.** mRNA expression of seven predicted PHF8 direct target genes was measured by real time PCR in control and PHF8 RNAi HeLa cells. Data are presented as % of input. Standard deviation bars were obtained from three independent experiments. p values from T-Test are shown.

```

hPHF8      MASVPVYCLCRLHYDVTTRFMIECDVCQDWFHGSCVGVVEEKAADIDLYHCPNCEVLHGPSIMKKRRGSSKGHDT----HKGKPVKTGSPTFVRELRSRTF 96
XM_689807  MASVPVYCLCRLHYDVTTRFMIECDVCQDWFHGSCVGVVEEDKAAEIDLYHCPNCQVTHGFSVMRKRRAVGHADVGLGRDSDGRPVKTGSAQFVRELRCRTF 100
zPHF8      MASVPVYCLCRLHYDVTTRFMIECDVCQDWFHGSCVGVVEEDKAAEIDLYHCPNCQVTHGFSVMRKRRAVGHADVGLGRDSDGRPVKTGSAQFVRELRCRTF 100

hPHF8      DSSDEVLLKPTGNQLTVEFLEENSFSVPIVLVKKDGLGMTLPSFSFTVRDVEHYVGSKEIDVIDVTRQADCKMKLGDVFKYYSYSGKREKVLNVISLEFS 196
XM_689807  PSADVLLKPTGAQLTVEFLEERSFSVPVLVLRKDGLGMNLPSSFSVTDVEHYIGTEKEIDVIDVSRQADLKMMLGFEVVEYNSPNRDRVLNVISLEFS 200
zPHF8      PSADVLLKPTGAQLTVEFLEERSFSVPVLVLRKDGLGMNLPSSFSVTDVEHYIGTEKEIDVIDVSRQADLKMMLGFEVVEYNSPNRDRVLNVISLEFS 200

hPHF8      DTRLNLVETPKIVRKLSDVENLWPEECVFERPNVQKYCLMSVRSYTFDFFHIDFGGTSVWYHVLKGEKIFYLIRPTNANLTLFECWSSSSSNQNEFFGDQ 296
XM_689807  DTRLNLVETPKIVRKLSDVENLWPEESIFERPNVQKYCLMGVSDSYTFDFFHIDFGGTSVWYHVLKGEKIFYLIRPTAANLSLFRWSSSSSNQNEFFGDQ 300
zPHF8      DTRLNLVETPKIVRKLSDVENLWPEESIFERPNVQKYCLMGVSDSYTFDFFHIDFGGTSVWYHVLKGEKIFYLIRPTAANLSLFRWSSSSSNQNEFFGDQ 300

hPHF8      VDKCYKCSVKQGQTLFIPTGWIHAVLTPVDCLAFGGNLFHLSLNIEMQLKAYEIEKRLSTADLFRFPNFETICWYVGHKILDIFRGLRENRRHPASYLVHG 396
XM_689807  VDMCYKCSVKQGNTLFIPTGWIHAVLTPVDCLAFGGNLFHLSLNDMQLRAYEIEKRLSTADLRFKFPNFETVCWYVGHKLLDTRFGLRENRRHPATYLVHG 400
zPHF8      VDMCYKCSVKQGNTLFIPTGWIHAVLTPVDCLAFGGNLFHLSLNDMQLRAYEIEKRLSTADLRFKFPNFETVCWYVGHKLLDTRFGLRENRRHPATYLVHG 400

hPHF8      GKALNLAFAWTRKEALPDHEDEIPEVTRVQLIKDLAREIRLVE----DIFQQNVGKTSNIFGLQRIFFAGSIPLTRPAHSTSVMSRSLSPSKNGSK 491
XM_689807  AKALNNAFRGWTRKESLGEHEQEIPDTIKTQQLVKDLAKEIRLVEVRSQDIFQQNIGRSGTFFGGSQGLPS---PHPKAQLNTPLTFS-----QHLSK 491
zPHF8      AKALNNAFRGWTRKESLGEHEQEIPDTIKTQQLVKDLAKEIRLVE----DIFQQNIGRSGTFFGGSQGLPS---PHPKAQLNTPLTFS-----QHLSK 486

hPHF8      KKGKPKKELFKKAERK---GKESSALGPAGQLSNLMDTYSHQALKTGSFQKAKFNITGACLNDSDDDSPDLDDLGNESPLALLMSNGSTKRVKSLSKSR 588
XM_689807  KRGPKEAFGGGGVPPGAKKKSQKGEIKTEAGELDLEIHTKHTLKKFQPGCKVKKSKLELPDDCLDDFEEKINKSKLKLVLTN-----KLQGKKG 586
zPHF8      KRGPKEAFGGGGVPPGAKKKSQKGEIKTEAGELDLEIHTKHTLKKFQPGCKVKKSKLELPDDCLDDFEEKINKSKLKLVLTN-----KLQGKKG 581

hPHF8      RTKIAKVDKARLMAEQVMEDEFDLDSDDELQIDERLGKEKATLIIRPK---FPRKLPRAKPCSDPNRVREPGEVDFDIEEDYTTDEDMVEGVEGKLG 684
XM_689807  RAGSANGAGSSLQFQPHMATLSDFDSEDELQIDETPPRRRPSLPSKKLGLAGLPRKLPRAKPCSDPHRIREPGEVDFDIEEDYTTDEMLT-MQGVKG- 684
zPHF8      RAGSANGAGSSLQFQPHMATLSDFDSEDELQIDETPPRRRPSLPSKKLGLAGLPRKLPRAKPCSDPHRIREPGEVDFDIEEDYTTDEMLT-MQGVKG- 679

hPHF8      GSGAGGILDLLKASRQVGGPDYAALTEAPASPSQEAIQGMLCMANLQSSSSSPATSSLQAWWTGG---QDRSSGSSSSGLGTVSNP--ASQRTPGKR 778
XM_689807  --GAGGILDLLKASKQVAGLDSALSEAPASPSTRDAIQGMLSMANPPSSSSSSSSSPLSISGGEMMGLMKEKGGREGWMSGVKKSERKAVFQRPGR 782
zPHF8      --GAGGILDLLKASKQVAGLDFALSEAPASPSTRDAIQGMLSMANPPSSSSSSSSSPLSISGGEMMGLMKEKGGREGWMSGVKKSERKAVFQRPGR 777

hPHF8      PIKRPAYWTESEEEEEENASLDEQDSLACFKDAEYIYPSLESDDDDPALKSRPKKKNSDDAPWSPKARVTPTLPKQDRPVREGTRVASIETGLAAAAA 878
XM_689807  PIKRPARHLSDE-----SLDEQETLGTCTFKDSYVYPSLESDEEDHVSXKMKRKRNDWTPWSPKARVTPTLPKQERPVEGARVASVETGLAAAAA 876
zPHF8      PIKRPARHLSDE-----SLDEQETLGTCTFKDSYVYPSLESDEEDHVSXKMKRKRNDW----- 831

hPHF8      KLAQQEQLQKAKKKYIKKKPLLKEVEQPRPQDSNLSLTVPAATPQLVTSSSPLPPEPKQEALSGSLADHEYTARPNAFGMAQANRSTTPMAPGVF 978
XM_689807  KLAQQEQKTIKTKRYTKKTPQEKVHSTVAQLQHQPDSAPVSPPLPSEPPVDCIV--EERRVEVYSASLLDHEYTAGPGPF-SPGGPRGSGAMAPGVF 972
zPHF8      -----

hPHF8      LTQRRPSVGSQ-----SNQAGQGRPKKGLATAKQRLGRIKLIHRNGKLLL 1024
XM_689807  LTSRRPSLSPQSSSYSPSAPSPGGLVTPTSAGACQGRPKKGLATAKQRLGRIKLIHRNGKLLL 1037
zPHF8      -----

```

**Supplemental Figure 11. Comparison of human and zebrafish PHF8.** The human PHF8 sequence was taken from nm\_015107, predicted zebrafish PHF8 (XM\_689807) was retrieved from Ensembl. zPHF8 shown above was cloned by RT-PCR using zebrafish RNA. The PHD finger was underlined with dotted line, the aromatic residues are boxed. The JmjC domain is underlined with the Fe(II)-binding residues (red box) and  $\alpha$  KG-binding (green box) residues highlighted. The zPHF8 clone we have isolated has five amino acids missing compared with XM\_689807 (red line) and is 204 amino acids shorter at the c-terminus.

## Supplemental Figure 12

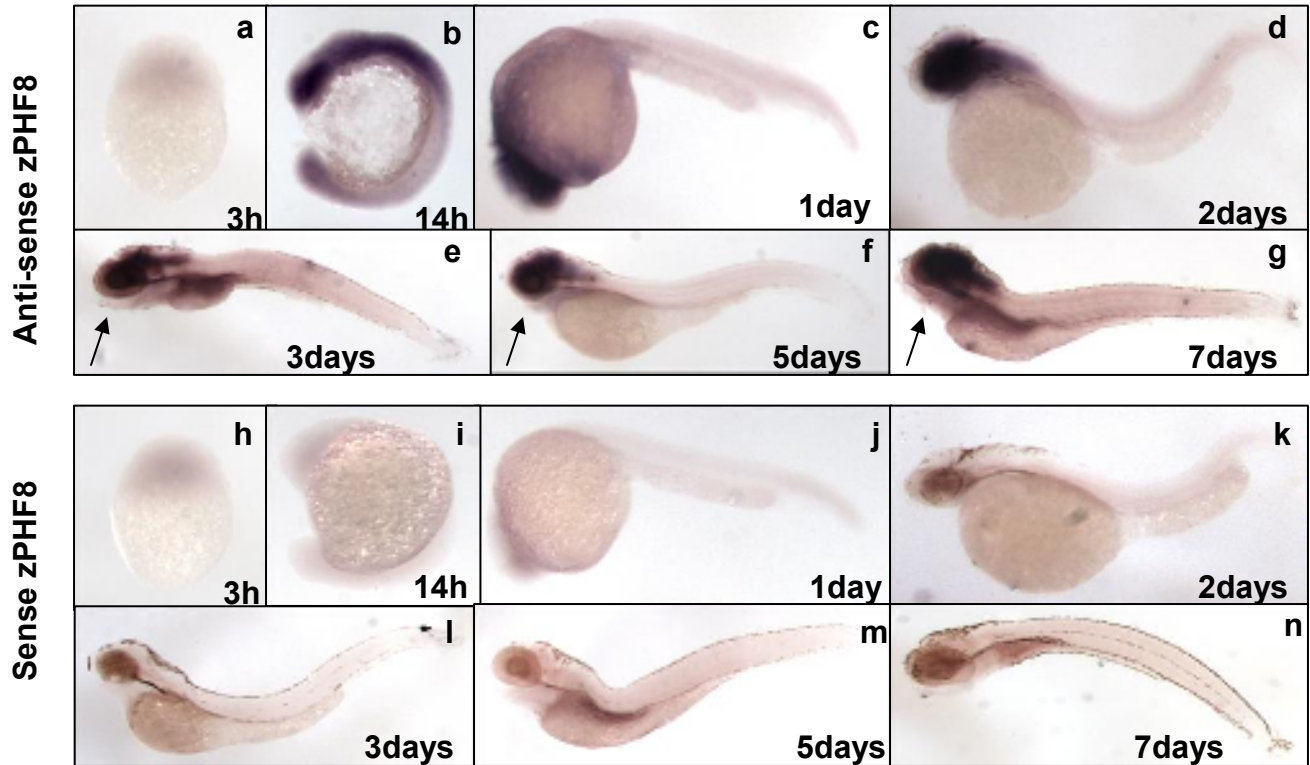

**Supplemental Figure 12. PHF8 expression in Zebrafish.** RNA in situ hybridization of whole mount zebrafish embryos was performed using sense and anti-sense zPHF8 probes. Panels a through g represents the antisense PHF8 probe hybridized to embryos at different developmental stages post fertilization. Panels h through n represent the sense control PHF8 probe hybridized to embryos at the same as those used for the antisense probe. Arrows point to the weak staining of the jaw not present in panels h through n.

### Supplemental Figure 13

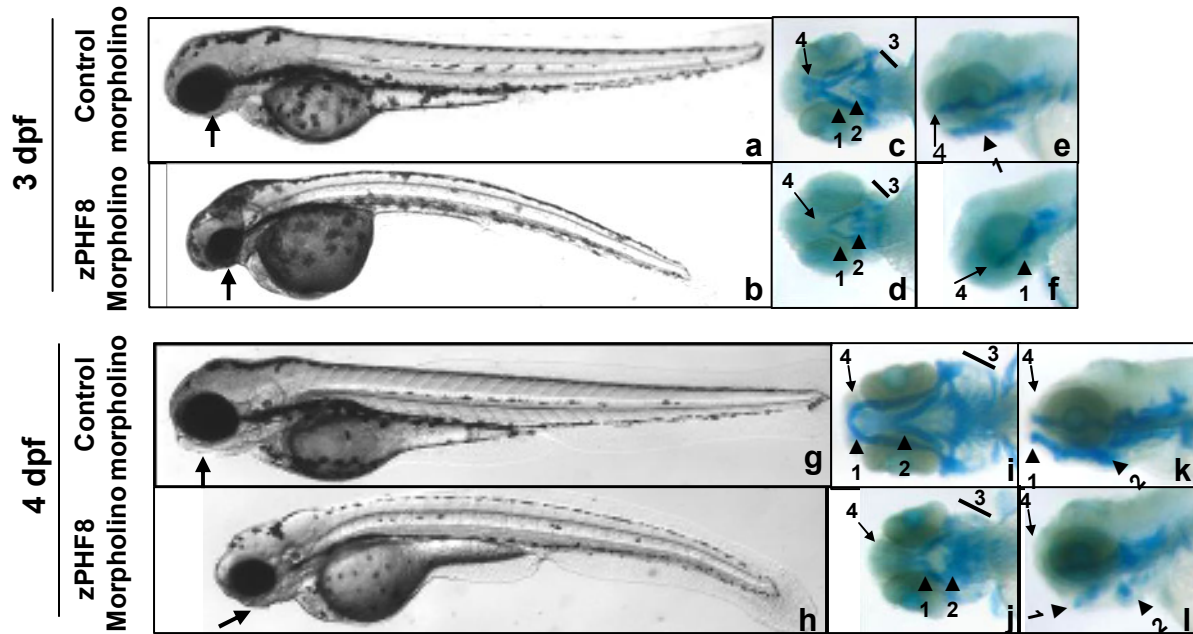

**Supplemental Figure 13.** Zebrafish embryos were injected at the 1 cell stage with 250uM of control or zPHF8 morpholino (MO). At 3 and 4 days post fertilization (dpf), PHF8 MO embryos displayed craniofacial developmental abnormalities including stunted lower jaw (compare panels b with a , h withg). Alcian Blue staining of the embryos at the same stages shows stunted 1st pharyngeal arch (1), inverted 2nd pharyngeal arch (2), deformed or absent 3rd through 5th pharyngeal arches (3). and delayed ethmoid plate (4) (compare panels d,f with c,e; j,l with i,k).

### Supplemental Table 5. Numbers of embryos analyzed in the zebrafish experiments

| Morpholino (MO) + mRNA   | Craniofacial analysis            |       |       |       | Apoptosis |
|--------------------------|----------------------------------|-------|-------|-------|-----------|
|                          | 24 hpf                           | 3 dpf | 4 dpf | 7 dpf | 30 hpf    |
| Control MO               | 30 <sup>a</sup> /32 <sup>b</sup> | 20/23 | 27/31 | 30/32 | 35/36     |
| zPHF8 MO                 | 37/42                            | 26/32 | 28/34 | 35/42 | 30/38     |
| zPHF8 MO + wt zPHF8      |                                  |       |       | 33/43 | 25/34     |
| zPHF8 MO + zPHF8 (H323Y) |                                  |       |       | 31/39 | 31/37     |
| zPHF8 MO + zMSXB         |                                  |       |       | 26/40 | 27/39     |

a: Numbers of zebrafish embryos with the phenotype(s) described in the text.

b: Total zebrafish embryos counted

## Supplemental Figure 14

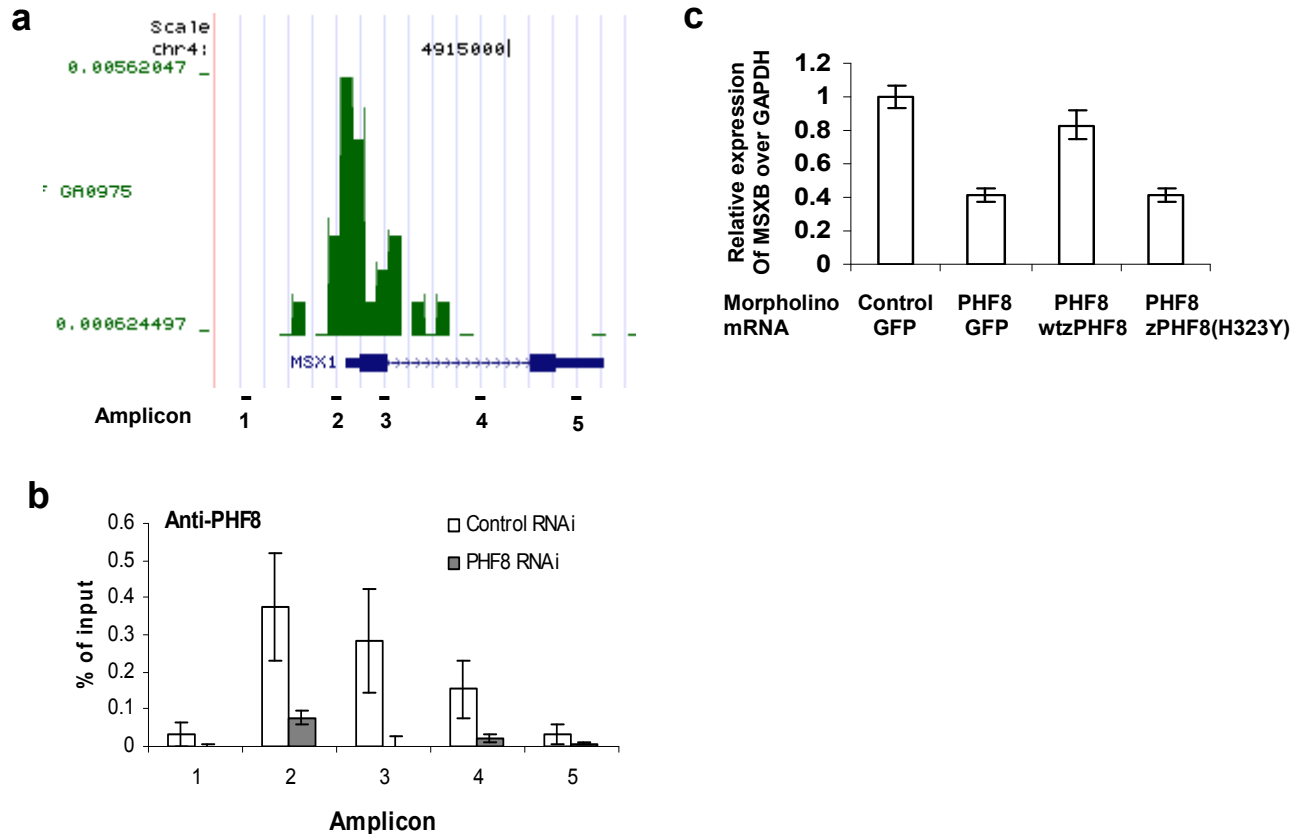

**Supplemental Figure 14. PHF8 targets MSX1 and regulates MSXB expression in Zebrafish.** **a.** PHF8 peaks around the TSS of MSX1 gene were identified by ChIP-seq in HeLa cell. **b.** Conventional ChIP with PHF8 antibody followed by real time PCR confirmed PHF8 binding to MSX1 in HeLa cells. Five amplicons are shown in a. The standard deviation was obtained from three independent experiments. **c.** Zebrafish embryos injected at the 1 cell stage with 250uM PHF8 ATG morpholino alone or with 200ng wt or mutant PHF8 mRNA were allowed to develop for 48hrs prior to harvesting and mRNA purification and reverse transcription. These samples were then subjected to RT-real time PCR. GAPDH was use as an internal control. Standard deviation bars were obtained from three independent experiments.



Supplemental Figure 15

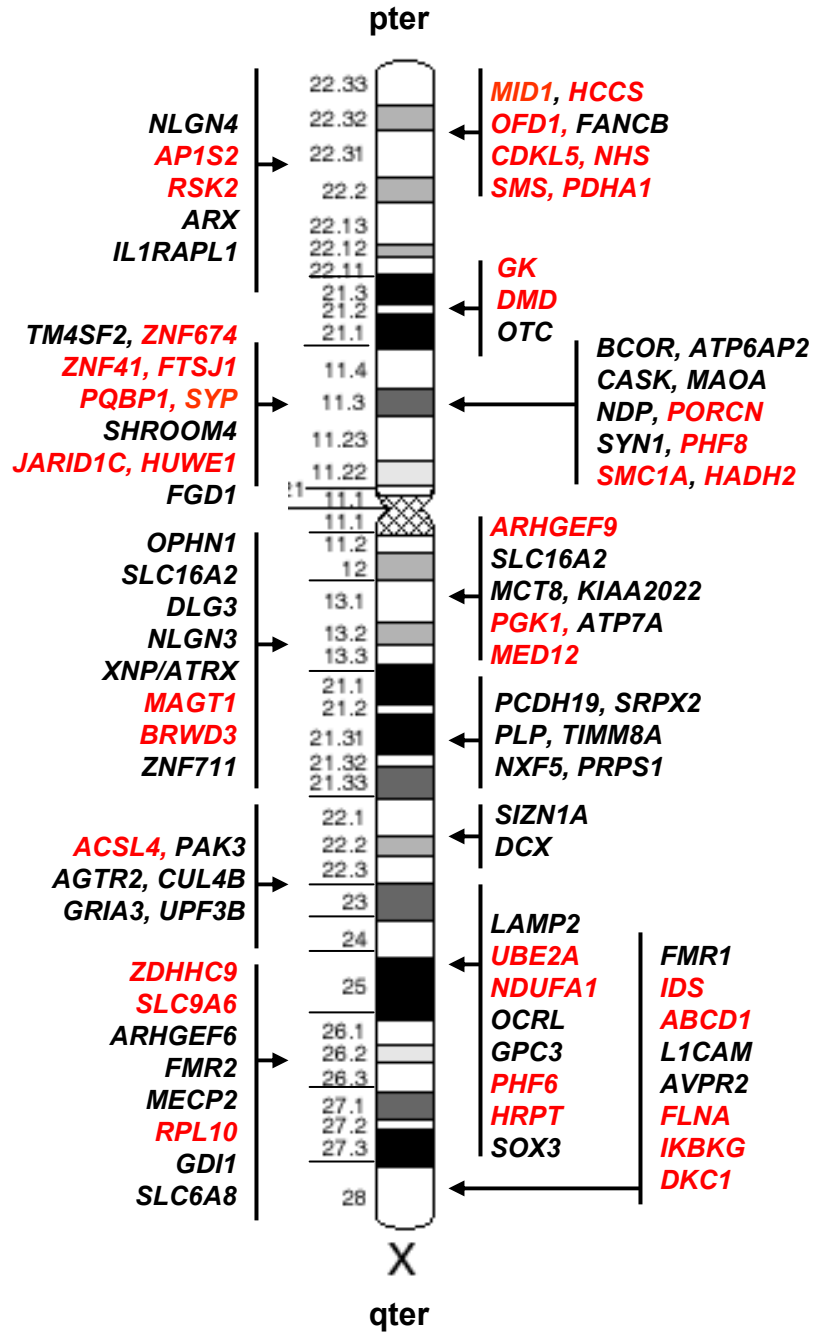

**Supplemental Figure 15. PHF8 direct target genes covers XLMR genes.** A total of 90 XLMR genes are listed. Genes mutated in Non-syndromic and syndromic XLMR are shown on the left and right, respectively. 40 potential PHF8 direct target genes identified by ChIP-seq or ChIP-chip are in red.

**Supplemental Table 7. Antibodies**

| <b>Antibody</b> | <b>Source; Cat. No.</b>   | <b>Application</b>                  |
|-----------------|---------------------------|-------------------------------------|
| Anti-H3K4me3    | Upstate; 07-473           | WB <sup>a</sup> , ChIP <sup>b</sup> |
| Anti-H3K9me1    | Abcam; ab8896             | WB, IF <sup>c</sup> , ChIP          |
| Anti-H3K9me2    | Abcam; ab1220             | WB, IF, ChIP                        |
| Anti-H3K27me1   | Upstate; 07-448           | WB, IF, ChIP                        |
| Anti-H3K27me2   | Upstate; 07-452           | WB, IF                              |
| Anti-H3K27me2   | Active motif; 39245       | ChIP                                |
| Anti-H3K27me3   | Upstate; 07-449           | WB, IF                              |
| Anti-H3K36me1   | Abcam; ab9048             | WB, IF, ChIP                        |
| Anti-H3K36me2   | Upstate; 07-369           | WB, IF, ChIP                        |
| Anti-H3K36me3   | Abcam; ab9050             | WB, IF                              |
| Anti-histone H3 | Abcam; ab1791             | WB, ChIP                            |
| Anti-H4K20me1   | Abcam; ab9051             | WB, IF, ChIP                        |
| Anti-H4K20me2   | Upstate; 07031            | WB                                  |
| Anti-H4K20me3   | Active motif; 39180       | WB                                  |
| L3MBTL1         | Active motif; 39182       | ChIP                                |
| Anti-H4         | Abcam; ab31827            | WB                                  |
| Anti-HA         | Covance; MMS-101P         | WB, IF                              |
| Anti-PHF8       | Abcam; ab36068            | WB, IF, ChIP                        |
| Anti-PHF8       | Active motif <sup>e</sup> | WB                                  |

a, WB: Western blot; b, ChIP: Chromatin immunoprecipitation

c, IF: immunofluorescence

**Supplemental Table 8. RT-real time PCR primers (5'-3')**

| Genes        | Forward primer               | Reverse primer          |
|--------------|------------------------------|-------------------------|
| FBXO7        | cgagacaatactgtcagagttcaagaca | ggtgtgagttgacgatggcagga |
| NCOA3        | ctcatccatctatcagtc           | actgctgccattcatgtgca    |
| APP          | gtacacatccattcatcatggt       | ggtctagtctcatctgctca    |
| PMM1         | caggacagcttcgacaccatc        | cgtgtcctgaggagacacca    |
| TFAP2C       | gcagctaggaagaacatgcta        | gtatgttcgtctccaagactg   |
| Tom1         | caccggcaacctctcatc           | agaggcctccagagactgc     |
| DGCR2        | cctacacggcatacaagtac         | ccggagtaatgcacctcact    |
| C21orf59     | gtactatcacagaagacaaga        | catcagctggtgaacttcatct  |
| KLHL22       | gcaaccctcctcaacaagctgtatgta  | gacagatgaccactgtccag    |
| PDK3         | ctgtattccatggaaggcgt         | gcttcaggcgtggtcttgt     |
| PHF8 (3'UTR) | gccttctccactgaggagcagga      | ctcctatcctgcctccagctct  |
| RPL13A       | cctggaggagaagaggaaagaga      | ttgaggacctctgtgtattgtca |

**Supplemental Table 9. ChIP-real time PCR primers (5'-3')**

| Genes    | Amplicon | Forward primer            | Reverse primer           |
|----------|----------|---------------------------|--------------------------|
| FBXO7    | Amp1*    | gtctagecggettccataca      | cagtgaggaatggtgccagga    |
|          | Amp2     | cctaaggcttctcagagcaga     | ccagtactactccctgtgtg     |
|          | Amp3     | ggtagacagatcatagacaagta   | ccttctcatcattccagtctca   |
| TFAP2C   | Amp1     | cagctttggctagtgttgc       | gcagcttgaacaagctgtct     |
|          | Amp2     | cagacgctggtcaccgtga       | gcactcacctcgcagtctct ctt |
|          | Amp3     | cctcaccagatggacgaggtgcag  | aggtgctggctcgtcgacatt    |
| NCOA3    | Amp1     | cagaagtgagtggaagagaa      | gtcagtctctgtccctctg      |
|          | Amp2     | ggctgagcggcgagtttccg      | cctcctttatctccactcac     |
|          | Amp3     | agtactgtgtacgtgagac       | ccagtcaagaagacattagt     |
| KLHL22#  |          | gaggaatgaggtaggaccgaggca  | gatcgccaaggctcagtgagtc   |
| C21ORF59 |          | gtccgctggaggatggctgga     | cgcacttcttcgttcaggttga   |
| APP      |          | ggaaaaccgaaaacgcagcg      | gaacgcagggaaaagcgagg     |
| PMM1     |          | gcaggaaggagcgcgtcctctgcct | gtgtccacggtcacgctgct     |
| Tom1     |          | ctggcggttgctgtcagctgatt   | ggagagctacacgccagctcct   |
| DGCR2    |          | tgctgaggttcagccgagagtgt   | ggaccgtgccaagcggagggtca  |
| PDK3     |          | ccagccagaggcggagctga      | gctgcctctgtgacgtttgt     |

\* Amp (Amplicon)1: about 1.1~2.5kb upstream of TSS, Amp 2: PHF8 binding site, Amp 3: 1.5~3.2 kb downstream of TSS. # For the additional seven genes, one amplicon was chosen at PHF8 binding sites.
